# Supplementary material
Source: MDPI journal article supplement (https://www.mdpi.com/2413-8851/6/4/74)
Supplement: s1 [file s1]

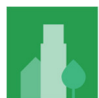

## Supplementary Materials

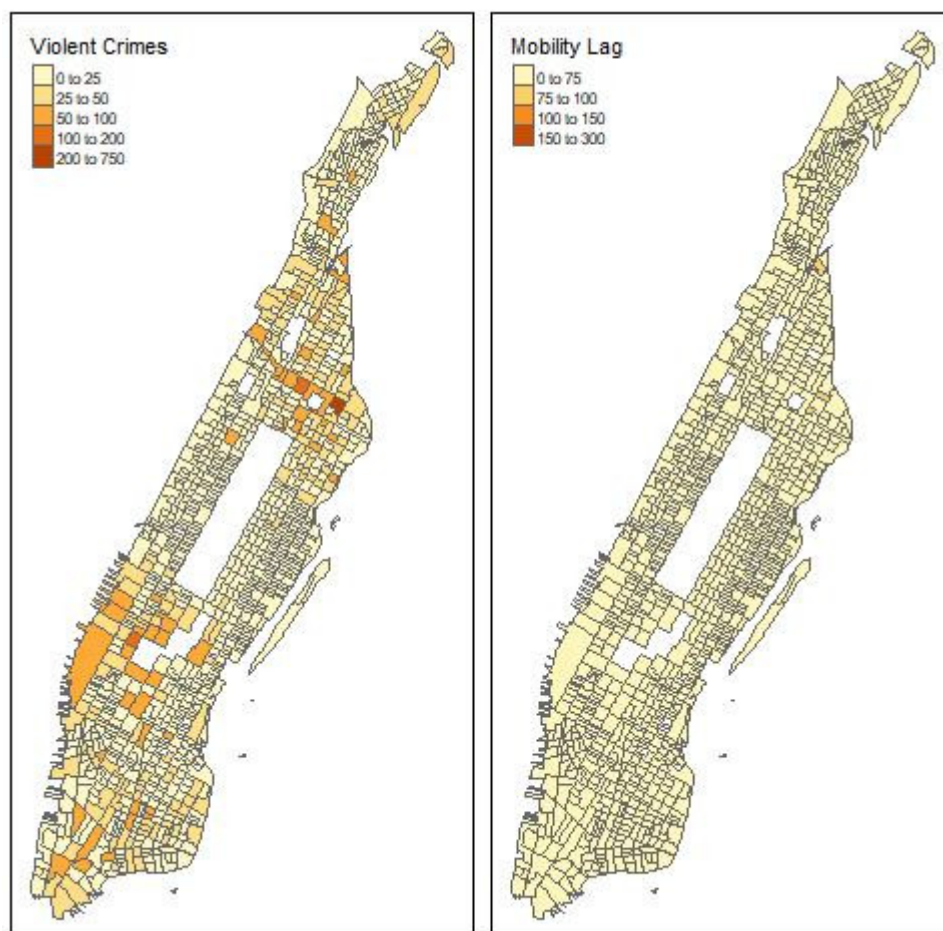

**Figure S1.** Manhattan.

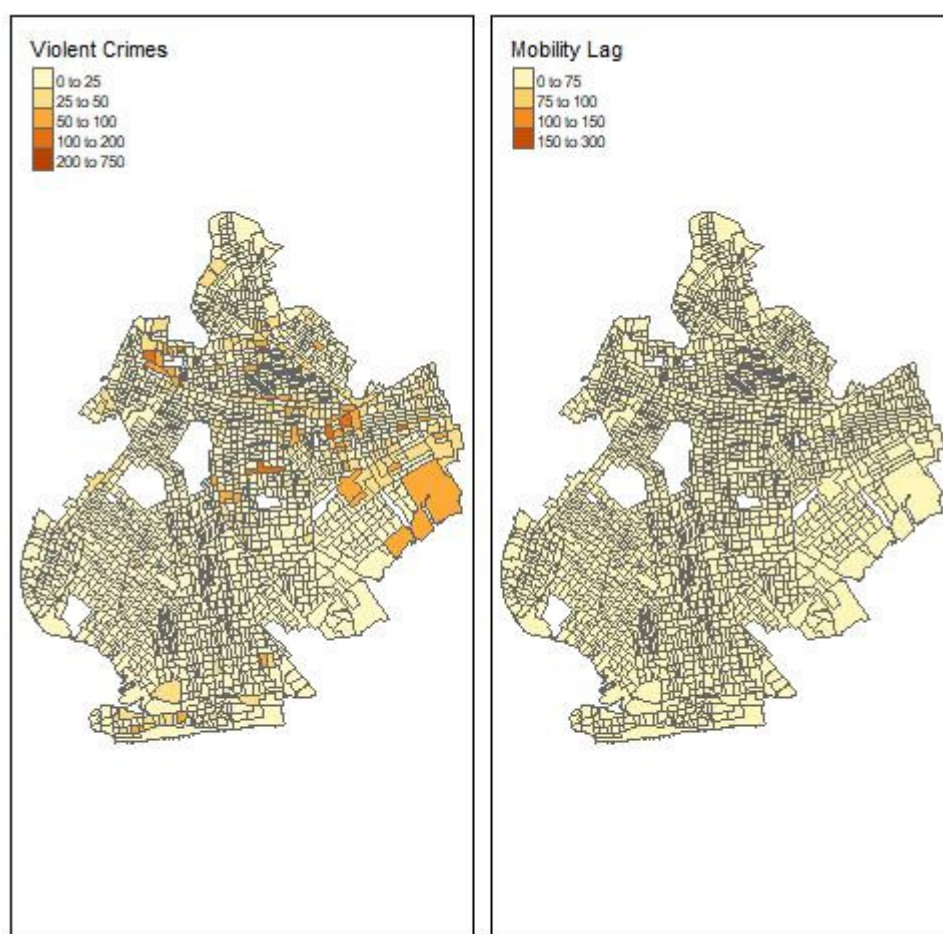

Figure S2. Brooklyn.

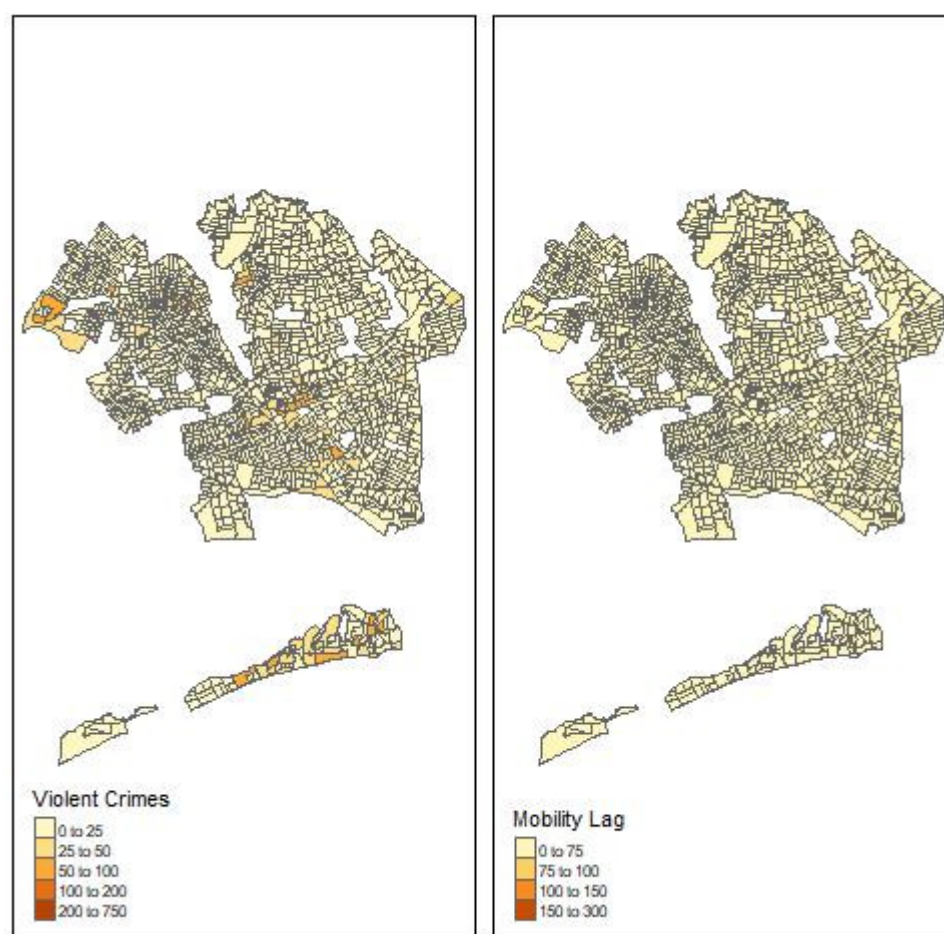

Figure S3. Queens.

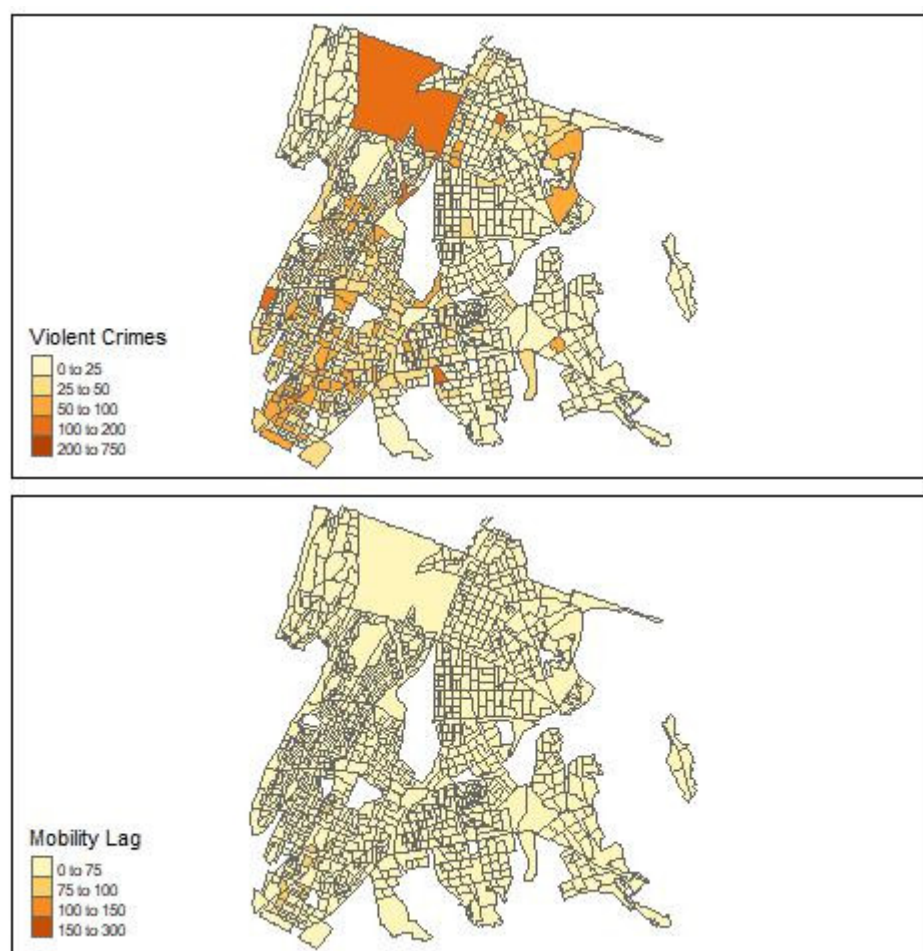

Figure S4. Bronx.

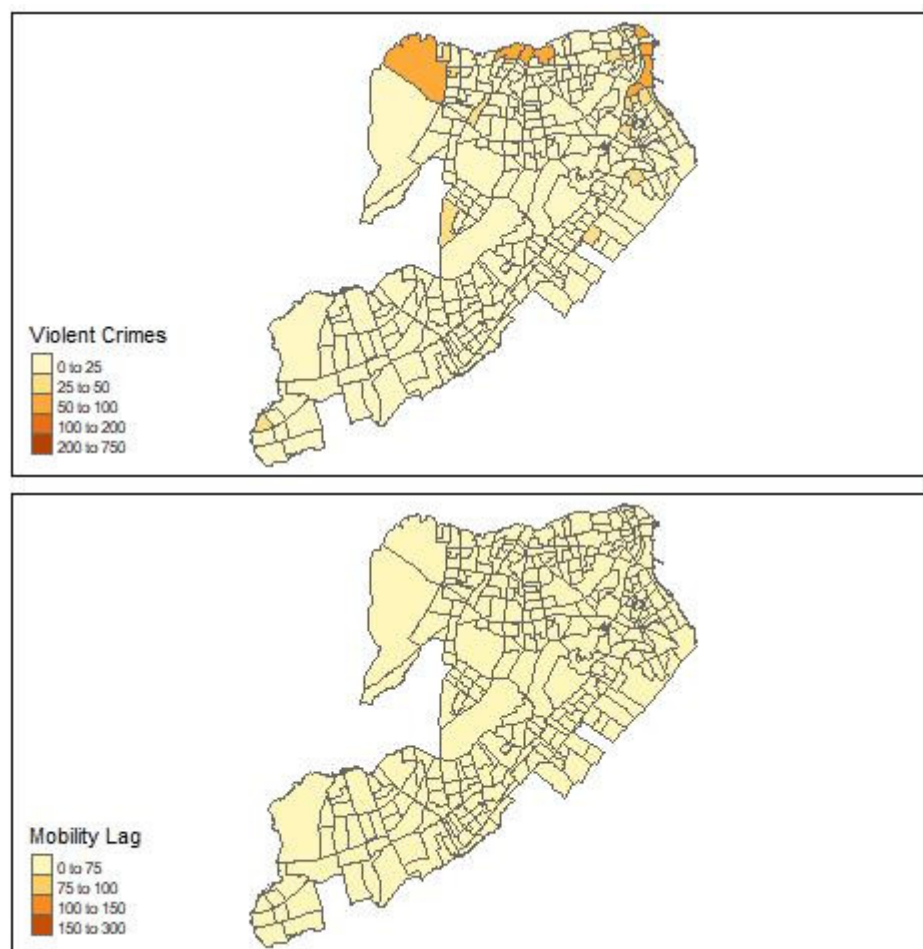

Figure S5. Staten Island.

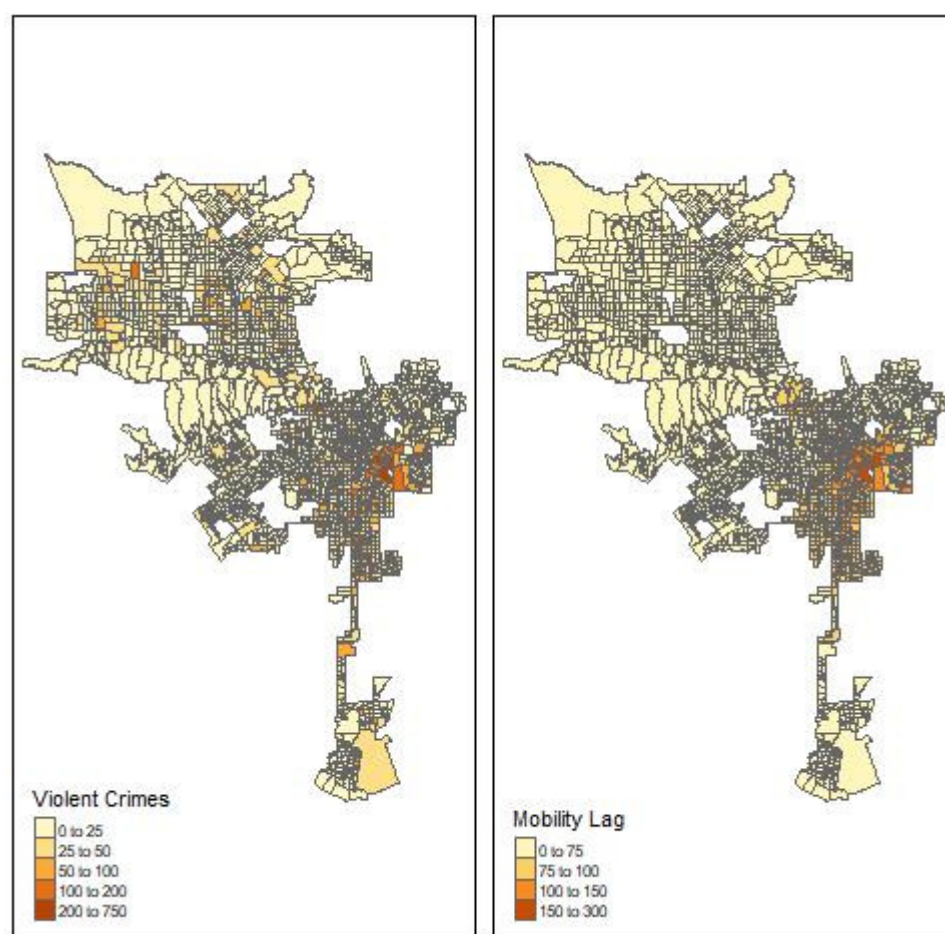

**Figure S6.** Los Angeles.
